# Supplementary material for: Decision Conflicts in Clinical Care during COVID-19: A Patient Perspective
Source: MDPI journal article supplement (doi:10.3390/healthcare10061019), 2022-05-31
Supplement: s1 [file s1]

# Decision Conflicts in Clinical Care During COVID-19: A Patient Perspective

**Table S1:** Significant differences between disease stage groups at 5-point scale of perception of the (A) decisional modification requirements (p=0.005) and (B) uncertainty (p=0.004); and (C) of education groups decisional modification requirements (p=0.014).

|                                        |            |          |          |       |            |       |
|----------------------------------------|------------|----------|----------|-------|------------|-------|
| (A)                                    |            |          |          |       |            |       |
| Disease Stage                          | Not at all | A little | Somewhat | A lot | Completely | Total |
| N/A                                    | 15         | 7        | 2        | 4     | 1          | 29    |
| Initial Treatment after Diagnosis      | 116        | 29       | 14       | 11    | 1          | 171   |
| Treatment Continuation                 | 98         | 22       | 16       | 8     | 7          | 151   |
| Recurrence/Metastasis/Crisis Treatment | 56         | 18       | 11       | 20    | 10         | 115   |
| Follow up                              | 23         | 7        | 7        | 3     | 1          | 41    |
| Total                                  | 308        | 83       | 50       | 46    | 20         | 507   |
| (B)                                    |            |          |          |       |            |       |
| Disease Stage                          | Not at all | A little | Somewhat | A lot | Completely | Total |
| N/A                                    | 9          | 7        | 11       | 2     | 1          | 30    |
| Initial Treatment after Diagnosis      | 85         | 44       | 20       | 17    | 5          | 171   |
| Treatment Continuation                 | 85         | 30       | 13       | 23    | 4          | 155   |
| Recurrence/Metastasis/Crisis Treatment | 42         | 27       | 19       | 18    | 9          | 115   |
| Follow up                              | 20         | 8        | 6        | 3     | 2          | 39    |
| Total                                  | 241        | 116      | 69       | 63    | 21         | 510   |
| (C)                                    |            |          |          |       |            |       |
| Education Group                        | Not at all | A little | Somewhat | A lot | Completely | Total |
| N/A                                    | 8          | 2        | 0        | 2     | 1          | 13    |
| Lower education                        | 58         | 23       | 1        | 7     | 1          | 90    |
| Intermediate education                 | 144        | 31       | 25       | 15    | 10         | 225   |
| Higher education                       | 98         | 27       | 24       | 22    | 8          | 179   |
| Total                                  | 308        | 83       | 50       | 46    | 20         | 507   |

**Table S2:** Correlations of the items general uncertainty, uncertainty related to their own treatment, resulting distress and the perception of own risk and requirements for treatment modifications. Pearson correlation, 2-sided significance and numbers of included respondents. \*\* Significant correlations p<0.01

|                           | General Uncertainty    | Own Treatment<br>Uncertainty | Uncertainty Distress   | Pandemic Own Risk      |
|---------------------------|------------------------|------------------------------|------------------------|------------------------|
| Own Treatment Uncertainty | .554**<br>0.000<br>481 | 1<br><br>510                 | .796**<br>0.000<br>496 | .275**<br>0.000<br>500 |
| Uncertainty Distress      | .557**<br>0.000<br>474 | .796**<br>0.000<br>496       | 1<br><br>500           | .308**<br>0.000<br>490 |
| Pandemic Own Risk         | .259**<br>0.000<br>483 | .275**<br>0.000<br>500       | .308**<br>0.000<br>490 | 1<br><br>511           |
| Own Decisions             | .588**<br>0.000<br>484 | .439**<br>0.000<br>479       | .417**<br>0.000<br>470 | .193**<br>0.000<br>482 |

**Table S3:** (A) Correlations of items reflecting the psychological environment of the healthcare professions. Pearson correlation, 2-sided significance and numbers of included respondents. \*\* Significant correlations  $p<0.01$ ; (B) Obtained factorial load after PCA-based factorial analysis of items related to individual psychological status; (C) Differences in the distribution of obtained components related to demographic characteristics for psychological status (mean and univariate ANOVA between the groups)

(A)

|                       | Anxiety                | Depression              | Loneliness              | Hope                    | Stress                 | Treatment<br>Uncertainty |
|-----------------------|------------------------|-------------------------|-------------------------|-------------------------|------------------------|--------------------------|
| Depression            | .580**<br>0.000<br>527 |                         |                         |                         |                        |                          |
| Loneliness            | .443**<br>0.000<br>529 | .707**<br>0.000<br>527  |                         |                         |                        |                          |
| Hope                  | -0.067<br>0.122<br>526 | -.299**<br>0.000<br>525 | -.254**<br>0.000<br>526 |                         |                        |                          |
| Stress                | .538**<br>0.000<br>526 | .691**<br>0.000<br>524  | .559**<br>0.000<br>527  | -.197**<br>0.000<br>523 |                        |                          |
| Treatment Uncertainty | .465**<br>0.000<br>500 | .498**<br>0.000<br>499  | .397**<br>0.000<br>510  | -.147**<br>0.001<br>498 | .442**<br>0.000<br>498 |                          |
| Uncertainty Distress  | .475**<br>0.000<br>490 | .525**<br>0.000<br>489  | .377**<br>0.000<br>500  | -.134**<br>0.003<br>488 | .486**<br>0.000<br>489 | .796**<br>0.000<br>496   |

(B)

| Factor components | Factorial load |
|-------------------|----------------|
| Depression        | 0.907          |
| Stress            | 0.837          |
| Loneliness        | 0.821          |
| Anxiety           | 0.730          |
| Hope              | -0.368         |

(C)

| Patient subgroups                      | Component<br>Mean |         |
|----------------------------------------|-------------------|---------|
| Oncology                               | -0.315            | p<0.001 |
| Psychiatry                             | 0.774             |         |
| ≤ 40 Years                             | 0.741             | p<0.001 |
| 41-65 Years                            | -0.107            |         |
| >65 Years                              | -0.394            |         |
| Low Education                          | -0.154            | p=0.231 |
| Intermediate Education                 | -0.018            |         |
| High Education                         | 0.093             |         |
| Initial Treatment after Diagnosis      | -0.276            | p<0.001 |
| Treatment Continuation                 | -0.082            |         |
| Recurrence/Metastasis/Crisis Treatment | 0.517             |         |
| Follow up                              | -0.206            |         |
| Male                                   | -0.223            | p<0.001 |
| Female                                 | 0.178             |         |

**Table S4:** Correlations of items reflecting the psychological environment of the healthcare professions. Pearson correlation, 2-sided significance and numbers of included respondents. \* Significant correlations p<0.05; \*\* Significant correlations p<0.01

|                       | Required Treatment<br>Modifications | Treatment Response     | Symptoms               | Effects/Complications  |
|-----------------------|-------------------------------------|------------------------|------------------------|------------------------|
| Treatment Response    | .110*<br>0.020<br>446               |                        |                        |                        |
| Symptoms              | .184**<br>0.000<br>437              | .827**<br>0.000<br>439 |                        |                        |
| Effects/Complications | .099*<br>0.042<br>421               | .759**<br>0.000<br>423 | .786**<br>0.000<br>422 |                        |
| SARS Additional Risk  | .374**<br>0.000<br>432              | .227**<br>0.000<br>428 | .314**<br>0.000<br>424 | .288**<br>0.000<br>413 |

**Table S5:** Prediction of by nominal regression analysis for “Decisional Uncertainty” (A) Likelihood –Quotient-Test for regression parameters; and (B) resulting classification. Inclusion of factor for psychological status

(A)

| Effect                                       | -2 Log-Likelihood<br>for reduced model | Likelihood-Quotient-Tests |    |              |
|----------------------------------------------|----------------------------------------|---------------------------|----|--------------|
|                                              |                                        | Chi²                      | dF | Significance |
| Constant Term                                | 491.117 <sup>a</sup>                   | 0.000                     | 0  |              |
| Factor Psychological Status                  | 513.671 <sup>b</sup>                   | 22.554                    | 4  | 0.000        |
| Decision Criteria SARS Additional Risk       | 557.386                                | 66.269                    | 16 | 0.000        |
| Burden Infection Risk                        | 564.557                                | 73.440                    | 16 | 0.000        |
| Information Availability Own Provider        | 549.913                                | 58.796                    | 16 | 0.000        |
| Education 3 groups                           | 543.249                                | 52.132                    | 12 | 0.000        |
| Speciality Group                             | 534.373                                | 43.256                    | 4  | 0.000        |
| Distance Regulations                         | 545.715                                | 54.598                    | 16 | 0.000        |
| Decision Criteria Side Effects/Complications | 517.461 <sup>b</sup>                   | 26.344                    | 16 | 0.049        |
| Decision Criteria Treatment Response         | 560.341                                | 69.224                    | 16 | 0.000        |
| Pandemic Own Risk                            | 539.933                                | 48.816                    | 16 | 0.000        |

(B)

| Predicted  |            |          |          |       |            |           | % Correct with neighbor |
|------------|------------|----------|----------|-------|------------|-----------|-------------------------|
| Observed   | Not at all | A little | Somewhat | A lot | Completely | % Correct |                         |
| Not at all | 124        | 14       | 7        | 3     | 0          | 83.8%     | 93.2%                   |
| A little   | 31         | 27       | 5        | 7     | 0          | 38.6%     | 90.0%                   |
| Somewhat   | 11         | 6        | 19       | 5     | 0          | 46.3%     | 73.2%                   |
| A lot      | 13         | 6        | 5        | 22    | 0          | 47.8%     | 58.7%                   |
| Completely | 0          | 0        | 0        | 0     | 16         | 100.0%    | 100.0%                  |
| % Total    | 55.8%      | 16.5%    | 11.2%    | 11.5% | 5.0%       | 64.8%     | 85.4%                   |
